# Supplementary material
Source: PubMed Central journal article supplement (PMC10099092)
Supplement: jamacardiol-e230592-s003.pdf [file jamacardiol-e230592-s003.pdf]

\*Indicates required information. Only first name, last name, and suffix will appear in PubMed.

| <b>*Group Name(s): The HOST-EXAM Investigators</b> |                   |                              |                  |                                                  |                                          |                                                         |                                                                                            |
|----------------------------------------------------|-------------------|------------------------------|------------------|--------------------------------------------------|------------------------------------------|---------------------------------------------------------|--------------------------------------------------------------------------------------------|
| <b>*First Name and Middle Initial(s)</b>           | <b>*Last Name</b> | <b>*Suffix (eg, Jr, III)</b> | Academic Degrees | Institution                                      | Location (city, state/province, country) | Role or Contribution, eg, chair, principal investigator | Group (if more than 1 Group listed in the byline) and/or Subgroup (eg, Steering Committee) |
| Ki-Bum                                             | Won               |                              | MD, PhD          | Ulsan University Hospital                        | Ulsan, Korea                             | Co-investigator                                         |                                                                                            |
| Tae-Ho                                             | Park              |                              | MD, PhD          | Dong-A University Hospital                       | Busan, Korea                             | Co-investigator                                         |                                                                                            |
| Bum Soo                                            | Kim               |                              | MD, PhD          | Kangbuk Samsung Hospital                         | Seoul, Korea                             | Co-investigator                                         |                                                                                            |
| Sang Wook                                          | Lim               |                              | MD, PhD          | CHA Bundang Medical Center                       | Seongnam, Korea                          | Co-investigator                                         |                                                                                            |
| Yoon Haeng                                         | Cho               |                              | MD, PhD          | Soonchunhyang University Bucheon Hospital        | Bucheon, Korea                           | Co-investigator                                         |                                                                                            |
| Dong Woon                                          | Jeon              |                              | MD, PhD          | National Health Insurance Service Ilsan Hospital | Goyang, Korea                            | Co-investigator                                         |                                                                                            |
| Sang-Hyun                                          | Kim               |                              | MD, PhD          | Boramae Medical Center                           | Seoul, Korea                             | Co-investigator                                         |                                                                                            |
| Kyoo-Rok                                           | Han               |                              | MD, PhD          | Kangdong Sacred Heart Hospital                   | Seoul, Korea                             | Co-investigator                                         |                                                                                            |
| Keon-Woong                                         | Moon              |                              | MD, PhD          | St. Vincent's Hospital                           | Seoul, Korea                             | Co-investigator                                         |                                                                                            |
| Seok Kyu                                           | Oh                |                              | MD, PhD          | Wonkwang University Hospital                     | Seoul, Korea                             | Co-investigator                                         |                                                                                            |
| Ung                                                | Kim               |                              | MD, PhD          | Yeungnam University Hospital                     | Seoul, Korea                             | Co-investigator                                         |                                                                                            |
| Moo-Yong                                           | Rhee              |                              | MD, PhD          | Dongguk University Ilsan Hospital                | Goyang, Korea                            | Co-investigator                                         |                                                                                            |
| Doo-Il                                             | Kim               |                              | MD, PhD          | Haeundae Paik Hospital                           | Busan, Korea                             | Co-investigator                                         |                                                                                            |
| Song-Yi                                            | Kim               |                              | MD, PhD          | Jeju National University                         | Jeju, Korea                              | Co-investigator                                         |                                                                                            |
| Sung-Yun                                           | Lee               |                              | MD, PhD          | Ilsan Paik Hospital                              | Goyang, Korea                            | Co-investigator                                         |                                                                                            |
| Seung Uk                                           | Lee               |                              | MD, PhD          | Kwangju Christian Hospital                       | Gwangju, Korea                           | Co-investigator                                         |                                                                                            |
| Sang-Wook                                          | Kim               |                              | MD, PhD          | Chung-Ang University Hospital                    | Seoul, Korea                             | Co-investigator                                         |                                                                                            |
| Seok Yeon                                          | Kim               |                              | MD, PhD          | Seoul Medical Center                             | Seoul, Korea                             | Co-investigator                                         |                                                                                            |
| Hui-Kyung                                          | Jeon              |                              | MD, PhD          | Uijeongbu St. Mary's Hospital                    | Uijeongbu, Korea                         | Co-investigator                                         |                                                                                            |
| Kwang Soo                                          | Cha               |                              | MD, PhD          | Pusan National University School of Medicine     | Busan, Korea                             | Co-investigator                                         |                                                                                            |
| Sang-Ho                                            | Jo                |                              | MD, PhD          | Hallym University Sacred Heart Hospital          | Anyang, Korea                            | Co-investigator                                         |                                                                                            |
| Jae Kean                                           | Ryu               |                              | MD, PhD          | Daegu Catholic University Medical Center         | Daegu, Korea                             | Co-investigator                                         |                                                                                            |
| Il-Woo                                             | Suh               |                              | MD, PhD          | Anyang SAM Medical Center                        | Anyang, Korea                            | Co-investigator                                         |                                                                                            |
| Hyun-Hee                                           | Choi              |                              | MD, PhD          | Chuncheon Sacred Heart Hospital                  | Chuncheon, Korea                         | Co-investigator                                         |                                                                                            |

Supplemental Online Content: Nonauthor Collaborators

\*Indicates required information. Only first name, last name, and suffix will appear in PubMed.

| <b>*First Name and Middle Initial(s)</b> | <b>*Last Name</b> | <b>*Suffix (eg, Jr, III)</b> | Academic Degrees | Institution              | Location (city, state/province, country) | Role or Contribution, eg, chair, principal investigator | Group (if more than 1 Group listed in the byline) and/or Subgroup (eg, Steering Committee) |
|------------------------------------------|-------------------|------------------------------|------------------|--------------------------|------------------------------------------|---------------------------------------------------------|--------------------------------------------------------------------------------------------|
| Seoung-Il                                | Woo               |                              | MD, PhD          | Inha University Hospital | Incheon, Korea                           | Co-investigator                                         |                                                                                            |
