# Supplementary material
Source: PubMed Central journal article supplement (PMC10099092)
Supplement: jamacardiol-e230592-s004.pdf [file jamacardiol-e230592-s004.pdf]

## **Data Sharing Statement**

### **Data**

**Data available:** No

### **Additional Information**

**Explanation for why data not available:** The HOST-EXAM trial is planning to continue follow-up until 2025. No individual participant data will be available before this. Any relevant inquiries should be sent to the corresponding author.
